# Supplementary material
Source: PubMed Central journal article supplement (PMC3770097)
Supplement: supp_M041368_jlr.M041368-1.pdf [file supp_M041368_jlr.M041368-1.pdf]

Supplementary Table I. Primers used for amplifying the Elovl2/Elovl5 chimeric constructs and Elovl5 and Elovl2 point mutations.

| Primer           | Template       | Direction | Sequence 5'-3'                                 | Corresponding figure |
|------------------|----------------|-----------|------------------------------------------------|----------------------|
| Chimera 1:       |                |           |                                                | Figure 4A            |
| Elovl2_1-600bp   | pYES2-Elovl2*  | EcoR1_F   | GCGGAATTCTTGGACAACATGTTTGGACCA*                |                      |
|                  |                | 600_R     | GGTCTGGATGATGGTCAGTACAAACTG                    |                      |
| Elovl2_670-840bp | pYES2-Elovl2*  | 670_F     | CAGATCGGATACATGATGACACTGGTT                    |                      |
|                  |                | Not1_R    | GACTGCGGCCGCGCTTCACCTCATTGCACCTTCTT<br>G*      |                      |
| Elovl5_643-711bp | pYES2-Elovl5*  | 643_F     | CTGACCATCATCCAGACCAGCTGCGGG                    |                      |
|                  |                | 711_R     | CATCATGTATCCGATCTGGAAGTACAG                    |                      |
| Chimera 2:       |                |           |                                                | Figure 4B            |
| Chimera2_W-K     | pYES2-Chimera1 | F         | AGCTGCGGGGTCATCAAGCCGTGCTCCTTCCCTCTC<br>GGGTGG |                      |
|                  |                | R         | CCACCCGAGAGGGAAGGAGCACGGCTTGATGACCC<br>CGCAGCT |                      |

|                  |                        |   |                                                                        |
|------------------|------------------------|---|------------------------------------------------------------------------|
| Chimera2_S-G     | pYES2-Chimera1_W-K     | F | AGCTGCGGGGTCATCAAGCCGTGCGGCTTCCCTCTC<br>GGGTGG                         |
|                  |                        | R | CCACCCGAGAGGGAAGCCGCACGGCTTGATGACCC<br>CGCAGCT                         |
| Chimera2_I-V_L-F | pYES2-Chimera1_W-K_S-G | F | CCAGCTGCGGGGTCGTCAAGCCGTGCGGCTTCCCTT<br>TCGGGTGGCTGTACTTCC             |
|                  |                        | R | GGAAGTACAGCCACCCGAAAGGGAAGCCGCACGG<br>CTTGACGACCCCGCAGCTGG             |
| Chimera 3:       |                        |   | Figure 4C                                                              |
| Chimera3_G-A_W-C | pYES2-Chimera2         | F | CCAGACCAGCTGCGCGGTTCGTCAAGCCGTGCGGCT<br>TCCCTTTCGGGTGCCTGTACTTCCAGATCG |
|                  |                        | R | CGATCTGGAAGTACAGGCACCCGAAAGGGAAGCCG<br>CACGGCTTGACGACCGCGCAGCTGGTCTGG  |
| Chimera 4:       |                        |   | Figure 4D                                                              |
| Chimera4_Y-I     | pYES2-Chimera3         | F | CCTTTCGGGTGCCTGATCTTCCAGATCGGATAC                                      |
|                  |                        | R | GTATCCGATCTGGAAGATCAGGCACCCGAAAGG                                      |

|              |                    |   |                                     |           |
|--------------|--------------------|---|-------------------------------------|-----------|
| Chimera 5:   |                    |   |                                     | Figure 4E |
| Chimera5_C-S | pYES2-Chimera3     | F | CATCCAGACCAGCAGCGGGTCTGTC AAGC      |           |
|              |                    | R | GCTTGACGACCGCGCTGCTGGTCTGGATG       |           |
| Chimera5_S-L | pYES2-Chimera5_C-S | F | GACCATCATCCAGACCCTCAGCGGGTCTGTC AAG |           |
|              |                    | R | CTTGACGACCGCGCTGAGGGTCTGGATGATGGTC  |           |
| Set A:       |                    |   |                                     |           |
| Elov15_W231C | pYES2-Elov15*      | F | CCTTCCCTCTCGGGTGTCTGTACTTCCAGATCG   | Figure 5A |
|              |                    | R | CGATCTGGAAGTACAGACACCCGAGAGGGAAGG   |           |
| Elov15_Y233I | pYES2-Elov15*      | F | CCTCTCGGGTGGCTGATCTTCCAGATCGGATAC   | Figure 5B |
|              |                    | R | GTATCCGATCTGGAAGATCAGCCACCCGAGAGG   |           |
| Elov15_S218L | pYES2-Elov15*      | F | ATCATCCAGACCCTCTGCGGGGTCATC         | Figure 5C |
|              |                    | R | GATGACCCCGCAGAGGGTCTGGATGAT         |           |
| Elov15_C219S | pYES2-Elov15*      | F | CATCCAGACCAGCAGCGGGGTCATCTGG        | Figure 5D |
|              |                    | R | CCAGATGACCCCGCTGCTGGTCTGGATG        |           |
| Elov15_G220A | pYES2-Elov15*      | F | CCAGACCAGCTGCGCGGTCATCTGGCCG        | Figure 5E |
|              |                    | R | CGGCCAGATGACCGCGCAGCTGGTCTGG        |           |

---

Set B:

|              |               |   |                              |           |
|--------------|---------------|---|------------------------------|-----------|
| Elovl2_C231W | pYES2-Elovl2* | F | CCCCTTTGGCTGGCTCATCTTCCAG    | Figure 6A |
|              |               | R | CTGGAAGATGAGCCAGCCAAAGGGG    |           |
| Elovl2_C231A | pYES2-Elovl2* | F | CTTCCCCTTTGGCGCTCTCATCTTCCAG | Figure 6B |
|              |               | R | CTGGAAGATGAGAGCGCCAAAGGGGAAG |           |
| Elovl2_C231F | pYES2-Elovl2* | F | CTTCCCCTTTGGCTTCCTCATCTTCCAG | Figure 6C |
|              |               | R | CTGGAAGATGAGGAAGCCAAAGGGGAAG |           |

---

\*(1), restriction enzyme sites are indicated by italics, start or stop codons are underlined and point mutations are bold.

1. Gregory, M. K., R. A. Gibson, R. J. Cook-Johnson, L. G. Cleland, and M. J. James. 2011. Elongase reactions as control points in long-chain polyunsaturated fatty acid synthesis. *PLoS One* **6**: e29662.
